# Supplementary material for: Anti-Bacterial Adhesion on Abiotic and Biotic Surfaces of the Exopolysaccharide from the Marine Bacillus licheniformis B3-15
Source: MDPI journal article supplement (doi:10.3390/md21050313), 2023-05-20
Supplement: s1 [file s1]

# Anti-bacterial adhesion on abiotic and biotic surfaces of the exopolysaccharide from the marine *Bacillus licheniformis* B3-15

Vincenzo Zammuto <sup>1,2</sup>, Antonio Spanò <sup>1,2,\*</sup>, Eleonora Agostino <sup>1</sup>, Angela Macrì <sup>1</sup>, Claudia De Pasquale <sup>3</sup>, Guido Ferlazzo <sup>4</sup>, Maria Giovanna Rizzo <sup>1,2,\*</sup>, Marco Sebastiano Nicolò <sup>1,2</sup>, Salvatore Guglielmino <sup>1,2</sup> and Concetta Gugliandolo <sup>1,2</sup>

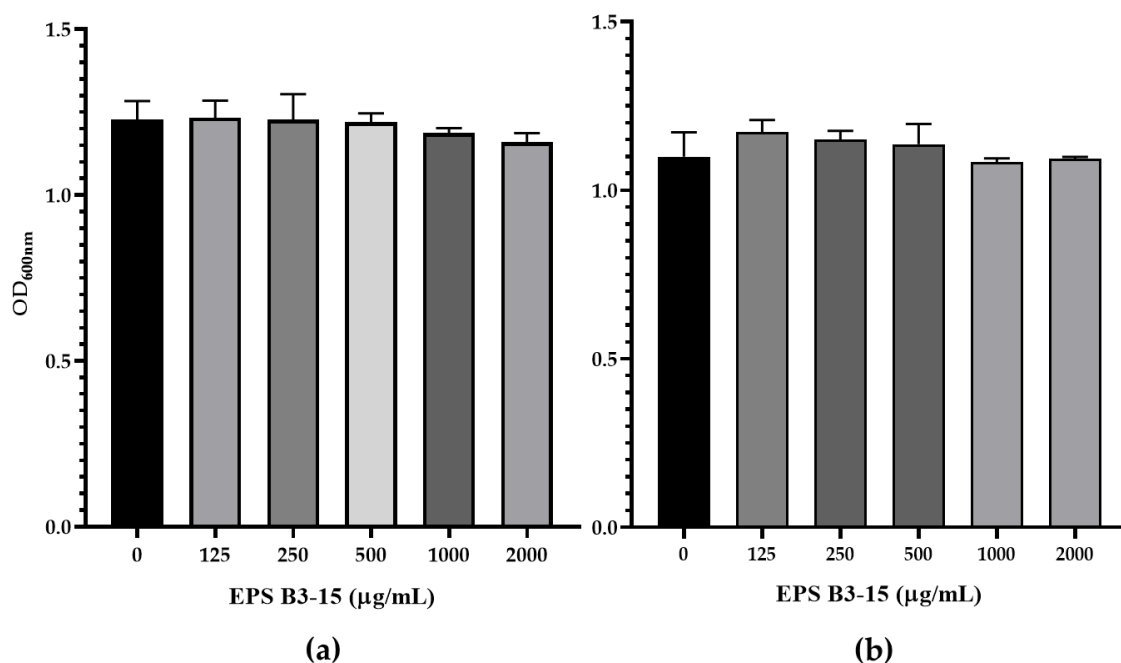

**Figure S1.** Effects of the EPS B3-15 addition at increasing concentrations (from 125 to 2000 µg/mL) on the growth (OD<sub>600nm</sub>) of *P. aeruginosa* (a) and *S. aureus* (b). Data are expressed as averages and standard deviations (n= 3).
